# Supplementary material
Source: publisher figshare collection journal article supplement (https://tandf.figshare.com/ndownloader/files/13612763)
Supplement: Supplementary file 1 [file 13612763]

**Adsorption of Hg(II) in aqueous solution by magnetic graphene oxide grafted polymaleicamide dendrimer nanohybrids**


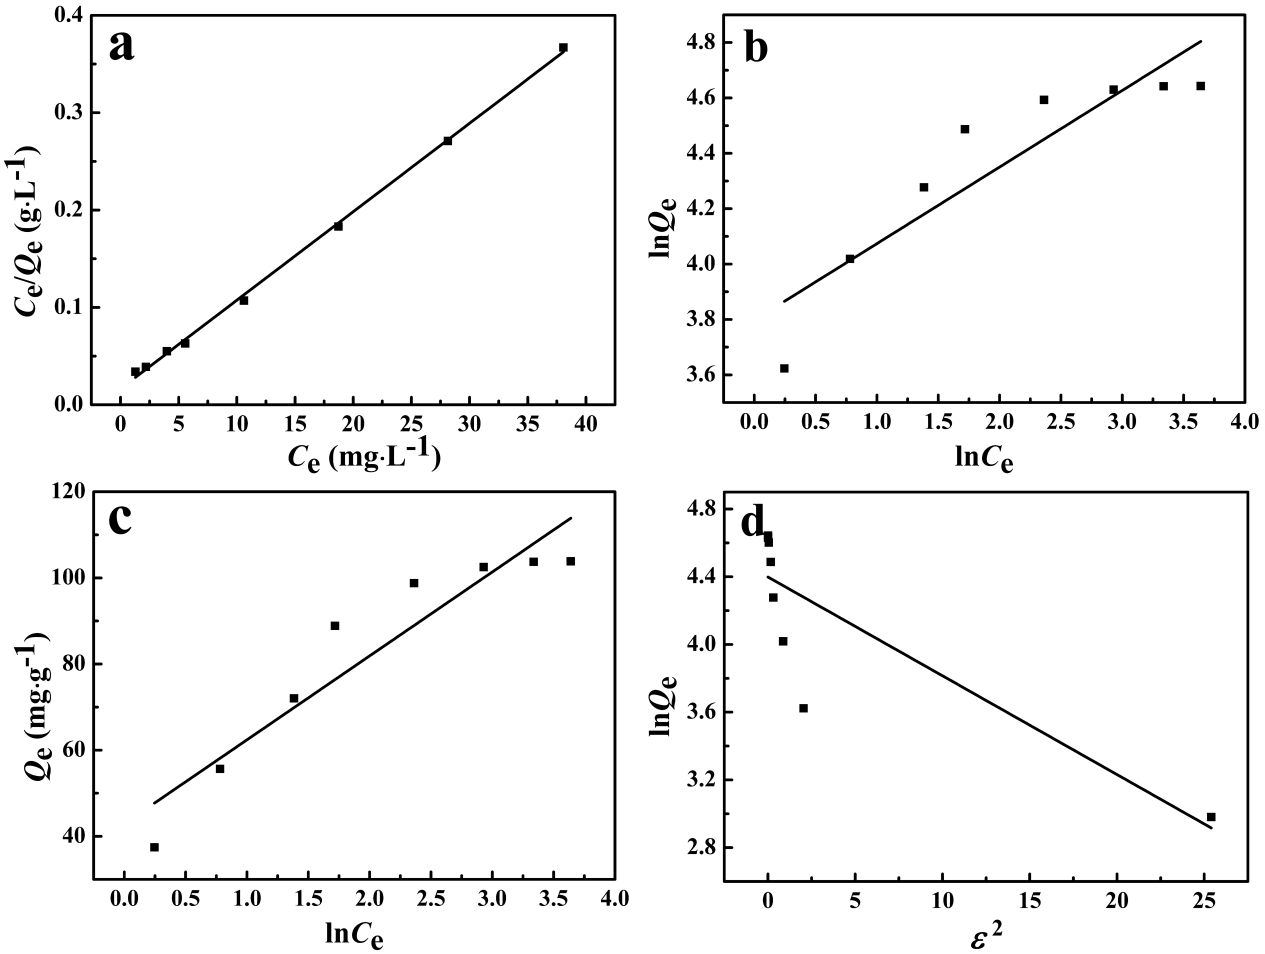


Fig. S1 Langmuir (a), Freundlich (b), Temkin (c) and Dubinin-Radushkevich (d) adsorption isotherms of Hg(II) adsorption onto GO/Fe3O4-*g*-G3.0 (*T*=298 K, *t*=10 h, pH=5.0, *M*=25 mg).


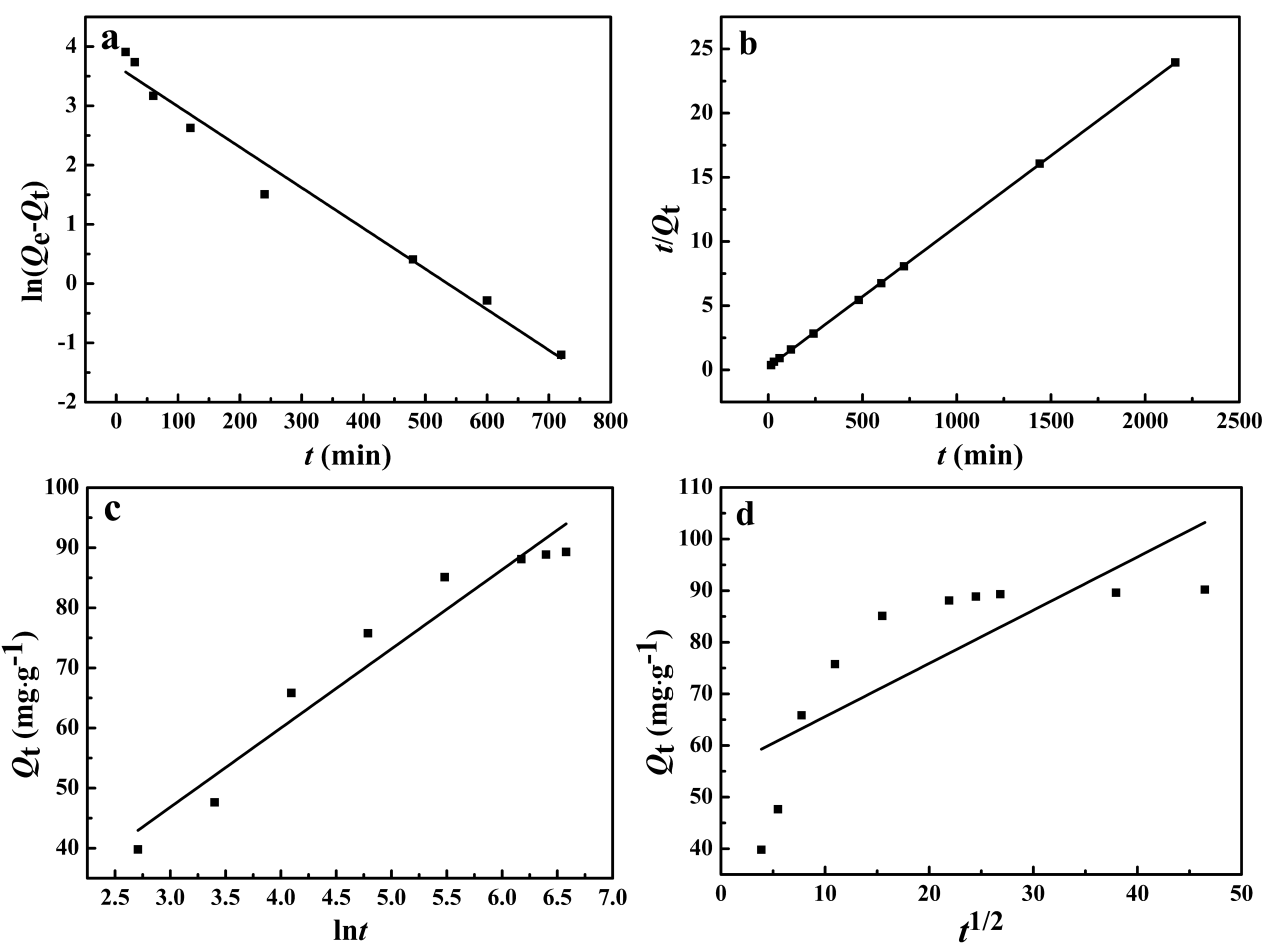


Fig. S2 Pseudo-first-order (a), pseudo-second-order (b), Elovich and Intraparticle diffusion kinetics of Hg(II) adsorption onto GO/Fe3O4-*g*-G3.0 (*C*0=50 mg·L-1, *T*=298 K, pH=5.0, *M*=25 mg).
